# Supplementary material for: Five-Year Development Plans of Renewable Energy Policies in Iran: A Content Analysis
Source: MDPI journal article supplement (doi:10.3390/su14031501), 2022-01-27
Supplement: s1 [file s1]

Archive with 1 entries (1 files):
- sustainability-1513747-supplementary.pdf
