# Supplementary material for: Five-Year Development Plans of Renewable Energy Policies in Iran: A Content Analysis
Source: MDPI journal article supplement (doi:10.3390/su14031501), 2022-01-27
Supplement: s1 [file s1 › sustainability-1513747-supplementary.pdf]

**Supplementary Materials:**

**Table S1.** Name of upstream documents related to RE policies in Iran.

| Document name                                                                                   | Reference                                                                                             | Number of<br>Extracted Codes |
|-------------------------------------------------------------------------------------------------|-------------------------------------------------------------------------------------------------------|------------------------------|
| Fourth 5-year Development Plan (2004/5-2009/10)                                                 | ("Fourth program of economic, social and cultural development of the Islamic Republic of Iran," 2004) | 35                           |
| Fifth 5-year Development Plan (2011-2016)                                                       | ("Fifth program of economic, social and cultural development of the Islamic Republic of Iran," 2011)  | 23                           |
| Sixth 5-year Development Plan (2016-2021)                                                       | ("Sixth program of economic, social and cultural development of the Islamic Republic of Iran," 2016)  | 8                            |
| Twenty-Year Vision Document                                                                     | ("Twenty-Year Vision Document," 2003)                                                                 | 2                            |
| General Policies of Expediency Discernment Council                                              | ("General Policies of Expediency Discernment Council," 2001)                                          | 7                            |
| Comprehensive scientific map of the country (Iran)                                              | ("Comprehensive scientific map of the country ", 2011)                                                | 9                            |
| National Energy Strategy Document                                                               | ("National Energy Strategy Document ", 2017)                                                          | 7                            |
| Law of Targeting Subsidies                                                                      | ("Law of Targeting Subsidies ", 2009)                                                                 | 2                            |
| General Energy Policies                                                                         | ("General Energy Policies," 1998)                                                                     | 7                            |
| Research and technology priorities of Supreme Council for Science, Research and Technology      | ("Research and technology priorities of Supreme Council for Science, Research and Technology," 2017)  | 20                           |
| Membership law of the Government of the Islamic Republic of Iran in the IRENA                   | ("Membership law of the Government of the Islamic Republic of Iran in the IRENA," 2012)               | 1                            |
| The Law on the adhesion of the Government of the Islamic Republic of Iran to the Kyoto Protocol | ("Law on the adhesion of the Government of the Islamic Republic of Iran to the Kyoto Protocol," 2005) | 5                            |
| Cabinet enactment to Combat Air Pollution                                                       | ("Cabinet enactment to Combat Air Pollution," 2014)                                                   | 1                            |
| Plan to reduce air pollution in eight metropolises                                              | (" Plan to reduce air pollution in eight metropolises," 2016)                                         | 3                            |

|                                                                                      |                                                                                                   |     |
|--------------------------------------------------------------------------------------|---------------------------------------------------------------------------------------------------|-----|
| Law on the country's program and budget                                              | ("Law on the country's program and budget," 1973)                                                 | 9   |
| National Document for the Development of Knowledge-based Renewable Energy            | ("National Document for the Development of Knowledge-based Renewable Energy ", 2015)              | 81  |
| Law of Energy Consumption Pattern Reform                                             | ("Law of Energy Consumption Pattern Reform," 2011)                                                | 19  |
| Strategic Plan of the Power Ministry in 1404 Vision                                  | ("Strategic Plan of the Power Ministry in 1404 Vision," 2011)                                     | 23  |
| Special Document on Ultra-sectoral Energy Management                                 | ("Special Document on Ultra-sectoral Energy Management," 2005)                                    | 20  |
| The law of setting the government's financial regulations                            | ("Law of setting government's financial regulations," 2002)                                       | 6   |
| Communique of basic electricity purchase rate from new and clean energy power plants | ("Communique of basic of electricity purchase rate from new and clean energy power plants," 2016) | 1   |
| Bill of Receive of Renewable Electricity duty                                        | ("Bill of Receive of Renewable Electricity duty," 2012)                                           | 1   |
| Statute of SATBA                                                                     | ("Statute of Renewable Energy and Energy Efficiency Organization ", 2016)                         | 18  |
| Development Roadmap of Solar Energy Technologies in Iran                             | ("Development Roadmap of Solar Energy Technologies in Iran," 2014)                                | 10  |
| Document of wind energy technology development in Iran                               | ("Document of wind energy technology development in Iran," 2015)                                  | 6   |
| Document of Oil and Gas Sector Development                                           | ("Document of Oil and Gas Sector Development ", 2004)                                             | 8   |
| Purchase rate of Electricity Produced by non-governmental sectors                    | ("Purchase rate of electricity produced by non-governmental sectors," 2008)                       | 4   |
| Development Roadmap of Geothermal Energy Technologies                                | ("Development Roadmap of geothermal energy technologies," 2015)                                   | 8   |
| Development Roadmap of Biomass Energy Technologies                                   | ("Development Roadmap of Biomass Energy Technologies," 2015)                                      | 3   |
| Sum of codes                                                                         | -                                                                                                 | 347 |
